# Supplementary material for: SARS‐CoV‐2 Activated Peripheral Blood Mononuclear Cells (PBMCs) Do Not Provoke Adverse Effects in Trophoblast Spheroids
Source: PubMed Central journal article supplement (PMC11706221; doi:10.1111/aji.70039), 2025-01-07

Figure S1

Gating Strategy

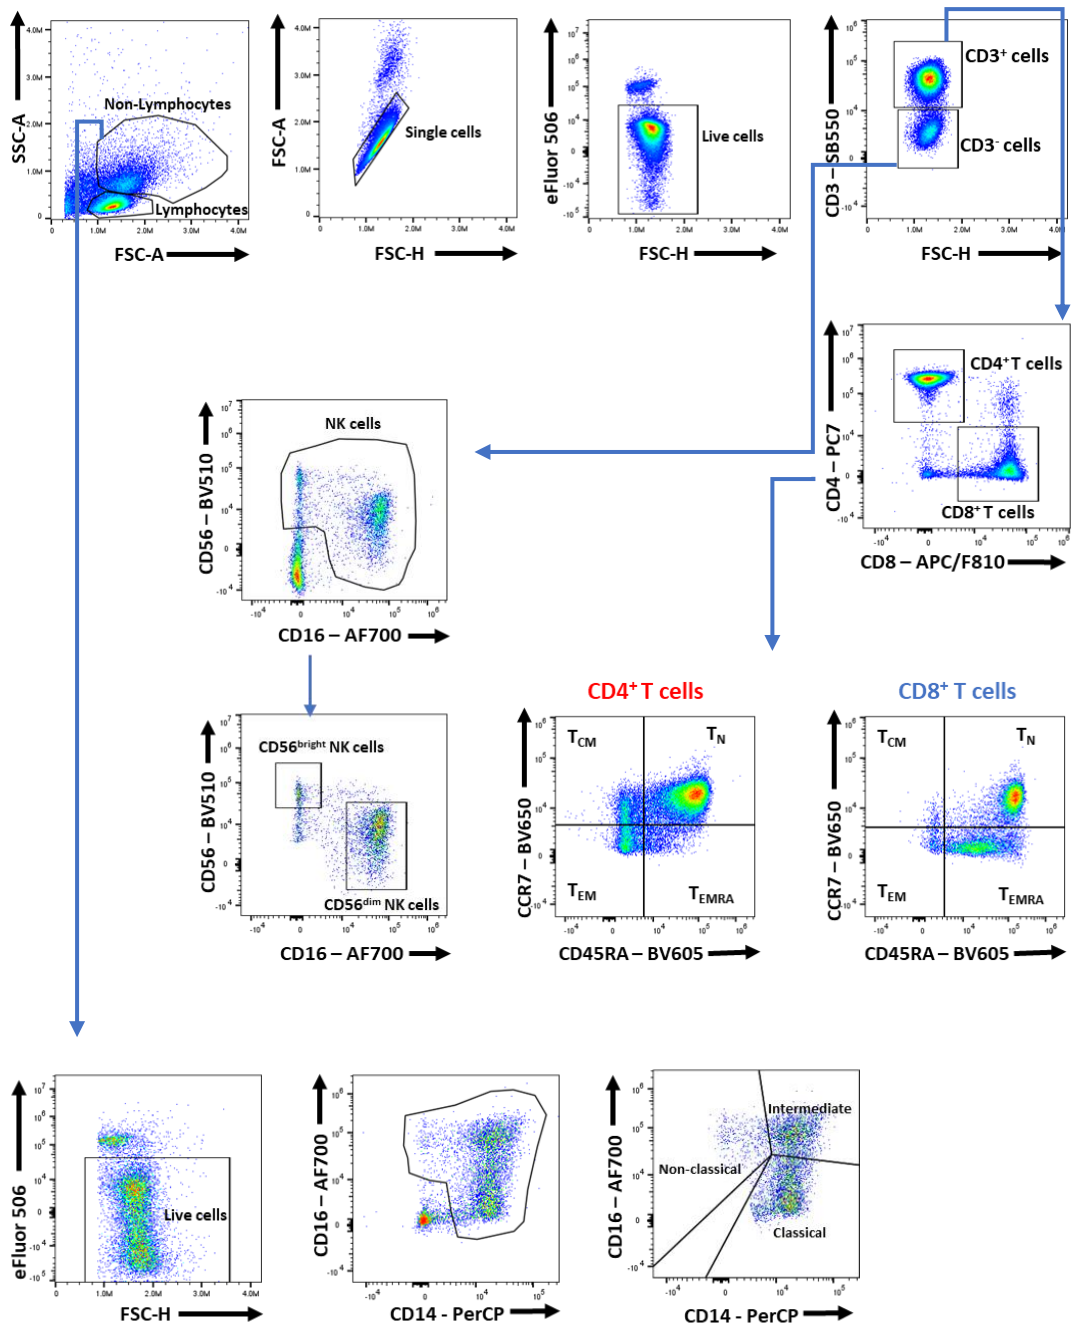

Figure S2

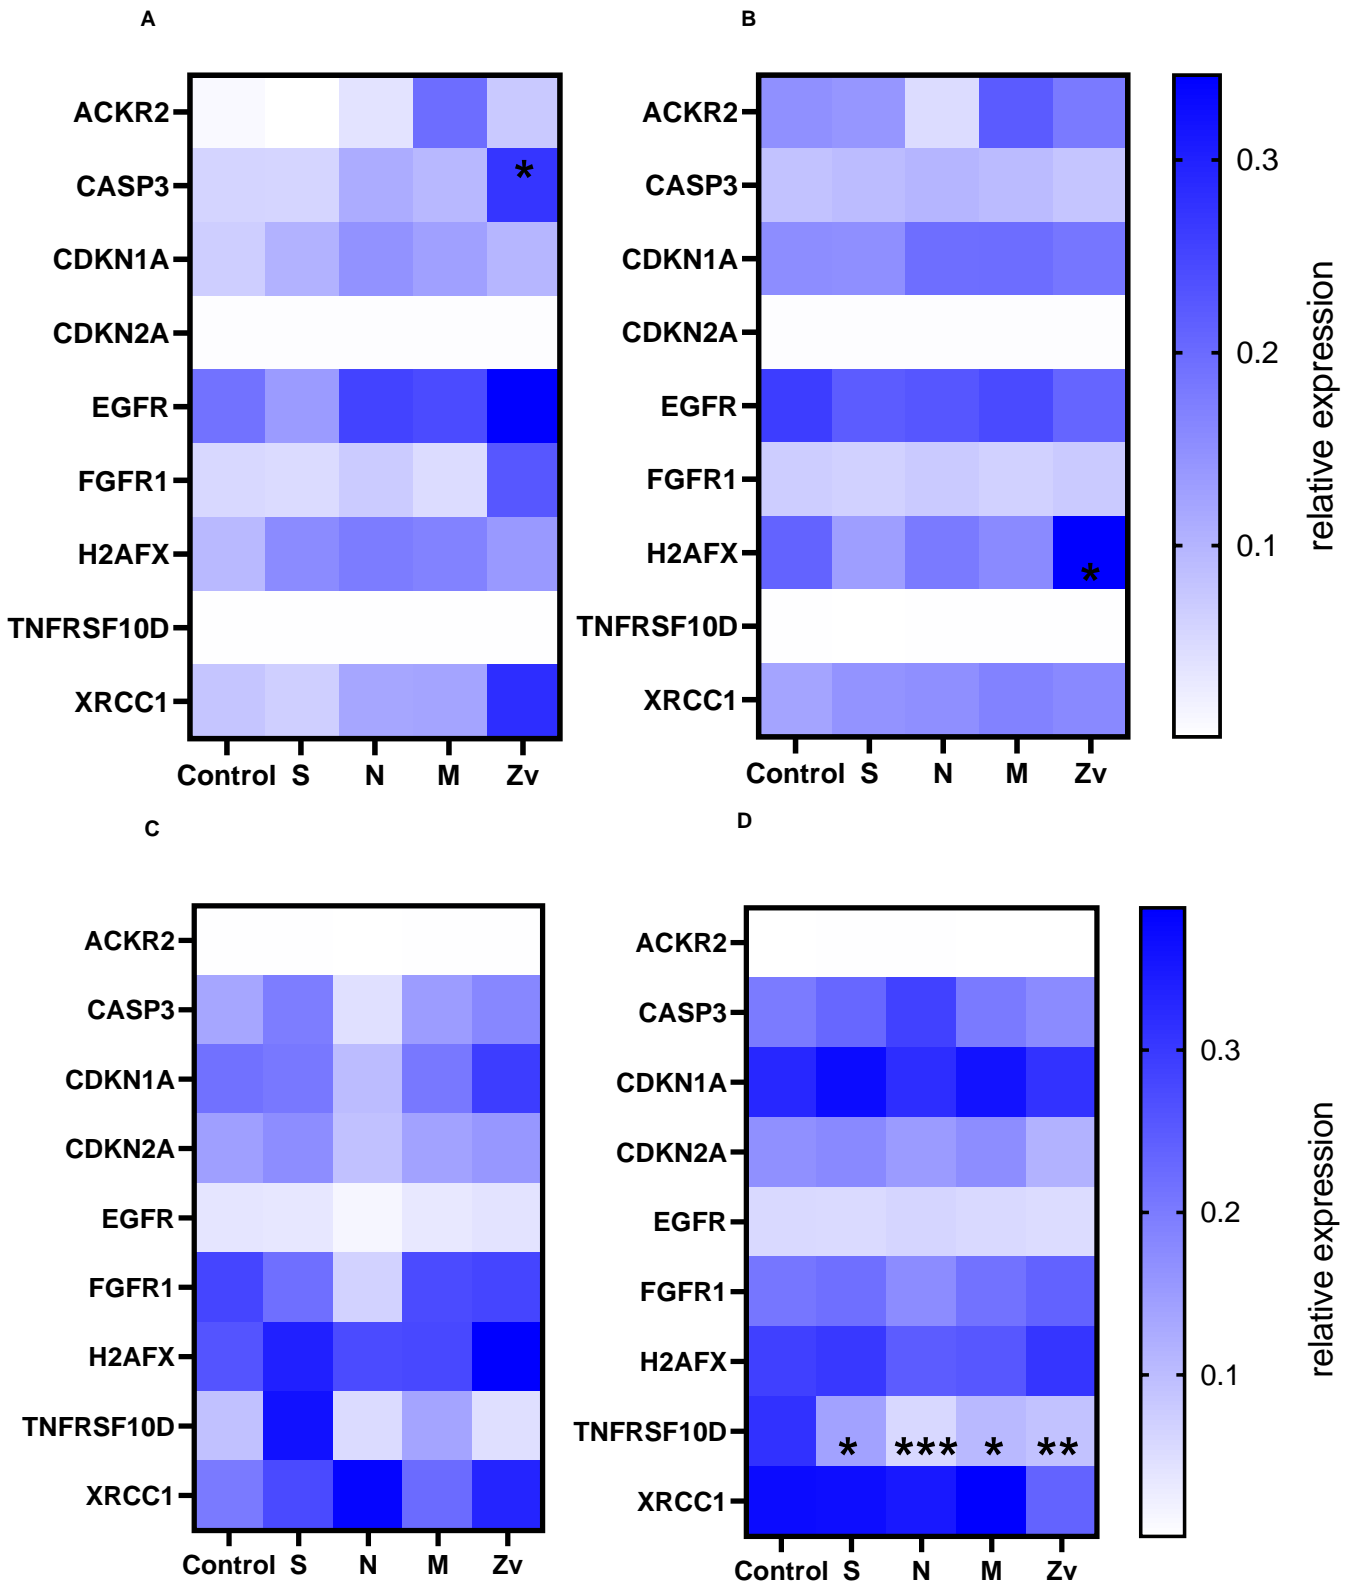

Supplement: AJI-93-e70039-s001.pdf [file AJI-93-e70039-s001.pdf]
